# Supplementary material
Source: ML conference proceedings conference paper supplement (https://openreview.net/forum?id=Gk75gOjtQh)

1

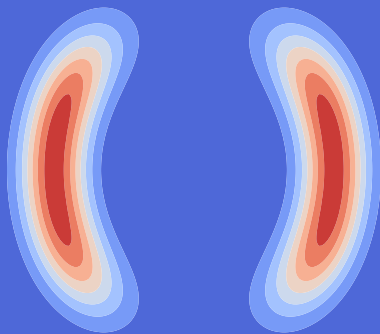

2

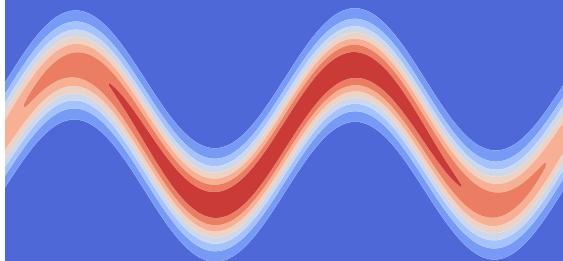

3

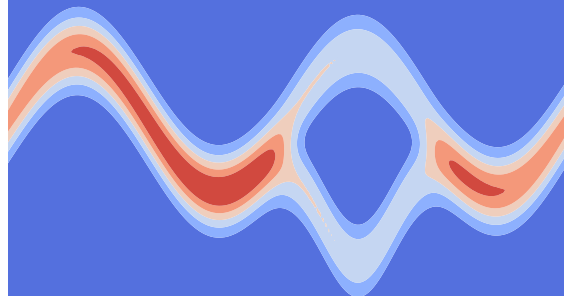

4

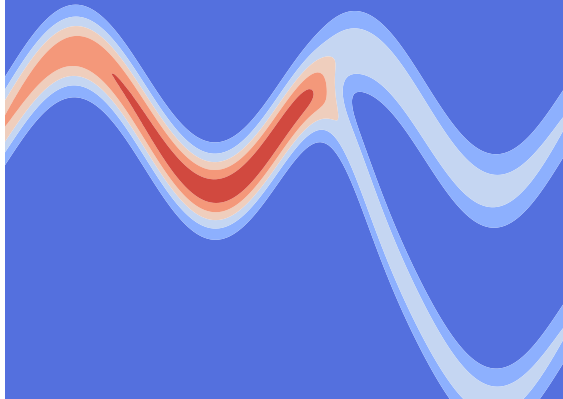

Supplement: supplementary_material [file attachment]
